# Supplementary material
Source: Royal Society of Chemistry journal article supplement (doi:10.1039/d6nj00683c)
Supplement: d6nj00683c1.pdf [file d6nj00683c1.pdf]

## Electronic Supporting Information (ESI)

### Screening Antimonene-Based Single-Atom Catalysts for Nitric Oxide

### Electroreduction to Ammonia by Density Functional Theory Computations

Qiuli Song,<sup>1,#</sup> Zhenghaoyang Zhu<sup>1,#</sup> Yuejie Liu,<sup>2,\*</sup> Peng Wu,<sup>3</sup> Jingxiang Zhao<sup>1</sup>

<sup>1</sup> College of Chemistry and Chemical Engineering, Harbin Normal University, Harbin, 150025, China

<sup>2</sup> Modern Experiment Center, Harbin Normal University, Harbin, 150025, China.

<sup>3</sup> Harbin Taiping Airport Customs, Harbin, 150008, China

\* To whom correspondence should be addressed. Email: liuyuejie@hrbnu.edu.cn (Y. J. Liu)

# Qiuli Song and Zhenghaoyang Zhu contribute equally to this work

## Computational Details

The Gibbs reaction free energy change ( $\Delta G$ ) of each elementary step during the NORR to multicarbon products synthesis was computed by using the computational hydrogen electrode (CHE) model. Based on this model, the  $\Delta G$  value can be obtained by the formula:  $\Delta G = \Delta E + \Delta ZPE - T\Delta S + eU$ , where  $\Delta E$  is the reaction energy of reactant and product species adsorbed on the catalyst directly obtained from DFT computations;  $\Delta ZPE$  and  $\Delta S$  are the changes between the adsorbed species and the gas phase molecules in zero-point energies and entropy at 298.15 K, which can be calculated from the vibrational frequencies, and  $U$  represents the applied potential. Moreover, the NORR catalytic activity was estimated using the limiting potential ( $U_L$ ), computed as  $U_L = -\Delta G_{\max}/e$ , where  $\Delta G_{\max}$  is the free energy change of the most thermodynamically unfavorable elementary step, i.e., the potential-determining step (PDS). The adsorption energy ( $\Delta E_{\text{ads}}$ ) of the NO molecule was computed using the equation:  $\Delta E_{\text{ads}} = E_{*NO} - E^* - E_{NO}$ , where  $E_{*NO}$ ,  $E^*$ , and  $E_{NO}$  are the total electronic energies of the adsorbed NO, catalyst, and the free NO molecule, respectively.

**Table S1.** The distance between the anchored single-atom metals and Sb atoms ( $d_{\text{M-Sb}}$ , Å), the computed binding energies ( $E_{\text{bind}}$ , eV), the difference between the calculated binding energies and the cohesive energies of their respective bulk phases, and the band gap derived from the computed band structures.

| M/Sb | $d_{\text{M-Sb}}$ | $E_{\text{bind}}$ | $E_{\text{bind}} - E_{\text{coh}}$ | <i>band gap</i> |
|------|-------------------|-------------------|------------------------------------|-----------------|
| V    | 2.68              | -5.77             | -0.28                              | 1.10            |
| Cr   | 2.68              | -6.98             | -3.20                              | 0.26            |
| Mn   | 2.67              | -4.64             | -0.65                              | 0.00            |
| Fe   | 2.59              | -5.60             | -0.49                              | 0.45            |
| Co   | 2.48              | -5.14             | -0.20                              | 0.00            |
| Ni   | 2.49              | -5.55             | -0.39                              | 0.00            |
| Cu   | 2.56              | -4.01             | -0.17                              | 0.51            |
| Nb   | 2.74              | -7.04             | -7.45                              | 0.00            |
| Mo   | 2.71              | -7.41             | -7.03                              | 0.01            |
| Ru   | 2.56              | -7.63             | -0.38                              | 0.00            |
| Rh   | 2.57              | -6.96             | -0.91                              | 0.15            |
| Pd   | 2.62              | -5.04             | -1.34                              | 0.00            |
| Ag   | 2.73              | -3.33             | -0.71                              | 0.92            |
| Ta   | 2.71              | -7.29             | -7.33                              | 0.22            |
| W    | 2.69              | -6.75             | -7.62                              | 0.87            |
| Ir   | 2.55              | -8.09             | -0.76                              | 0.00            |
| Pt   | 2.59              | -7.23             | -1.70                              | 0.00            |
| Au   | 2.68              | -4.51             | -1.43                              | 0.03            |

**Table S2.** The distance between the anchored single-atom metals and the N ( $d_{\text{N-Metal}}$ , Å), the adsorption strength of NO molecule on these M/Sb catalysts ( $E_{\text{ads}}$ , eV) and the calculated free energies change of  $\Delta G^*_{\text{NO}}$  and  $\Delta G^*_{\text{NHO}}$ .

| M/Sb | $d_{\text{N-Metal}}$ | $E_{\text{ads}}$ | $\Delta G^*_{\text{NO}}$ | $\Delta G^*_{\text{NHO}}$ |
|------|----------------------|------------------|--------------------------|---------------------------|
| V    | 1.74                 | -3.08            | -2.19                    | -0.21                     |
| Cr   | 1.66                 | -2.44            | -1.73                    | 0.62                      |
| Mn   | 1.69                 | -2.37            | -1.65                    | 0.42                      |
| Fe   | 1.68                 | -2.79            | -2.13                    | 0.58                      |
| Co   | 1.65                 | -2.58            | -1.92                    | 0.82                      |
| Ni   | 1.70                 | -2.05            | -1.37                    | 0.61                      |
| Cu   | 1.78                 | -1.29            | -0.59                    | 0.34                      |
| Nb   | 1.85                 | -4.60            | -2.90                    | -0.59                     |
| Mo   | 1.79                 | -3.51            | -2.79                    | 0.54                      |
| Ru   | 1.77                 | -3.17            | -2.45                    | 0.89                      |
| Rh   | 1.84                 | -1.91            | -1.21                    | 0.50                      |
| Pd   | 1.91                 | -1.34            | -0.66                    | 0.42                      |
| Ag   | 2.09                 | -0.81            | -0.13                    | 0.30                      |
| Ta   | 1.86                 | -3.72            | -3.01                    | -0.88                     |
| W    | 1.79                 | -4.16            | -3.45                    | 0.52                      |
| Ir   | 1.84                 | -2.23            | -1.54                    | 0.44                      |
| Pt   | 1.91                 | -1.56            | -0.88                    | 0.46                      |
| Au   | 2.05                 | -0.74            | -0.06                    | 0.24                      |

**Table S3.** Computed free energy changes ( $\Delta G$ , eV) for all potential elementary steps involved in the NORR to  $\text{NH}_3$  products on Au/Sb catalysts. Favorable steps are highlighted in red.

| Au/Sb                                                                                | $\Delta G$ |
|--------------------------------------------------------------------------------------|------------|
| $* + \text{NO} \rightarrow *\text{NO}$                                               | -0.06      |
| $*\text{NO} + \text{H}^+ + \text{e}^- \rightarrow *\text{NHO}$                       | 0.24       |
| $*\text{NO} + \text{H}^+ + \text{e}^- \rightarrow *\text{NOH}$                       | 1.15       |
| $*\text{NHO} + \text{H}^+ + \text{e}^- \rightarrow *\text{NH}_2\text{O}$             | -0.32      |
| $*\text{NHO} + \text{H}^+ + \text{e}^- \rightarrow *\text{NHOH}$                     | 0.06       |
| $*\text{NH}_2\text{O} + \text{H}^+ + \text{e}^- \rightarrow *\text{O} + \text{NH}_3$ | -1.69      |
| $*\text{NH}_2\text{O} + \text{H}^+ + \text{e}^- \rightarrow *\text{NH}_2\text{OH}$   | -0.38      |
| $*\text{O} + \text{H}^+ + \text{e}^- \rightarrow *\text{OH}$                         | -0.56      |
| $*\text{OH} + \text{H}^+ + \text{e}^- \rightarrow \text{H}_2\text{O} + *$            | -1.02      |

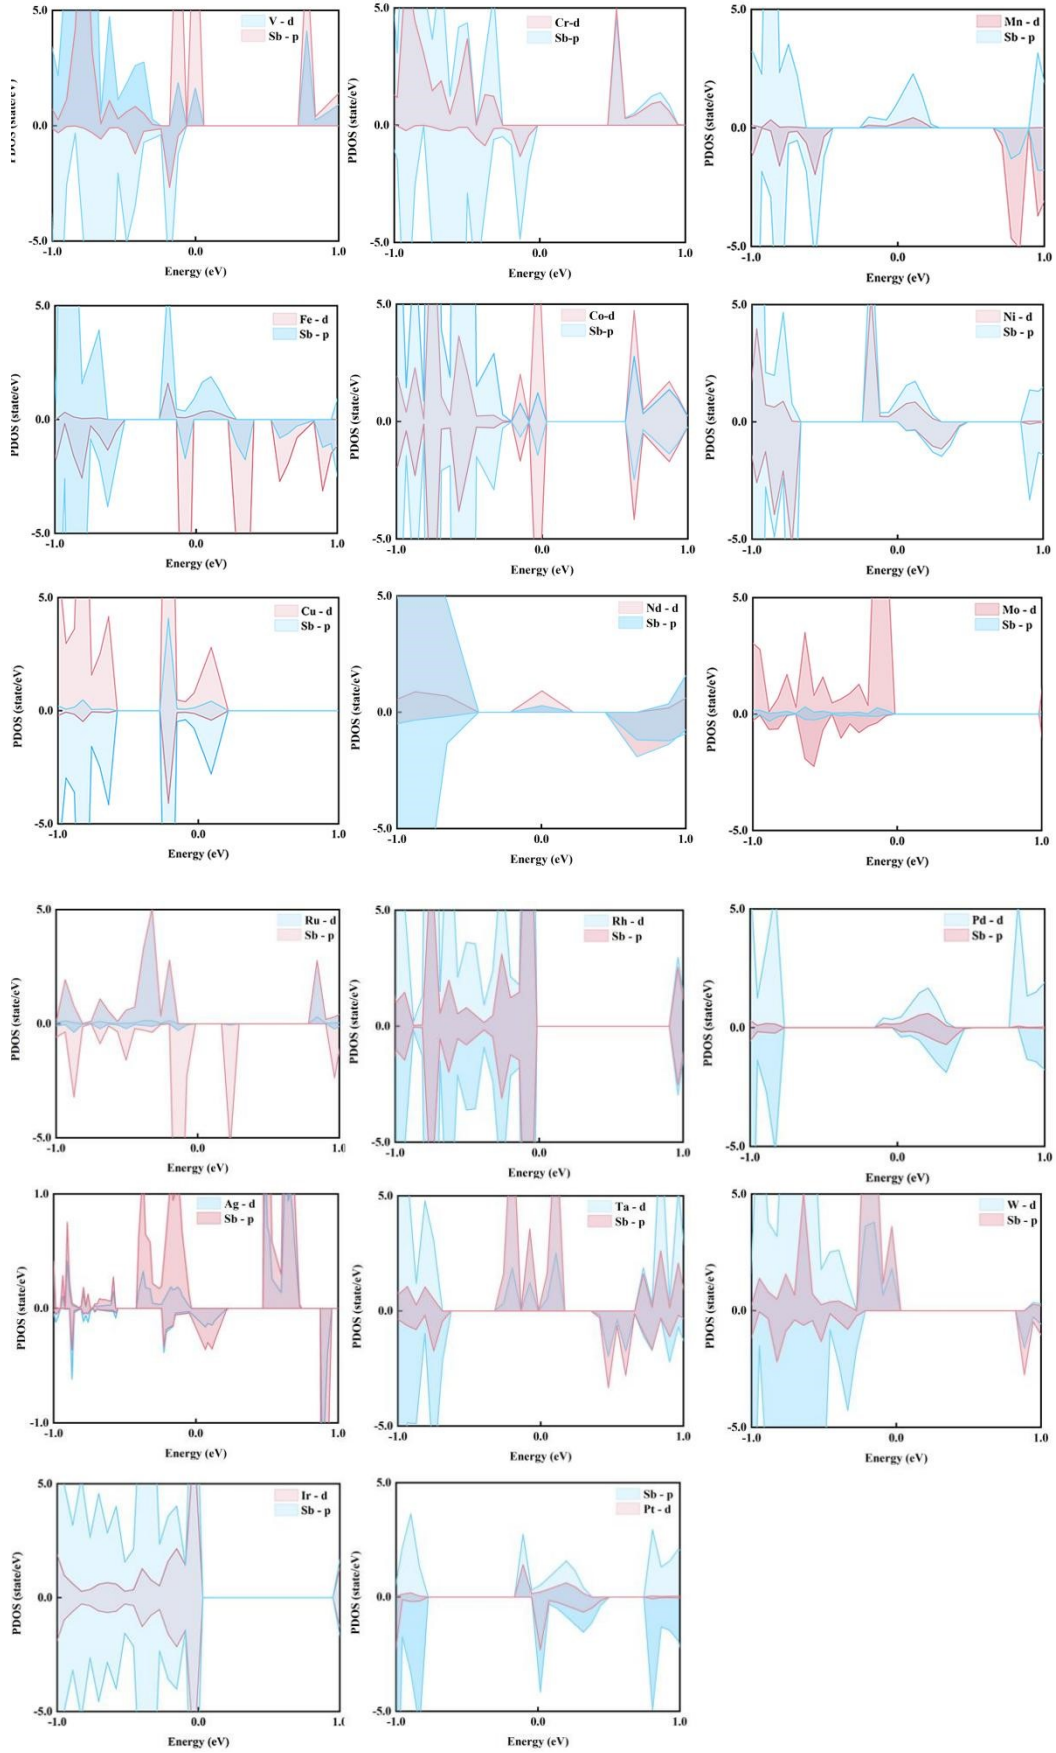

**Fig. S1.** The calculated partial density of states (PDOS) between the metal d-orbitals and Sb p-orbitals in M/Sb catalysts.

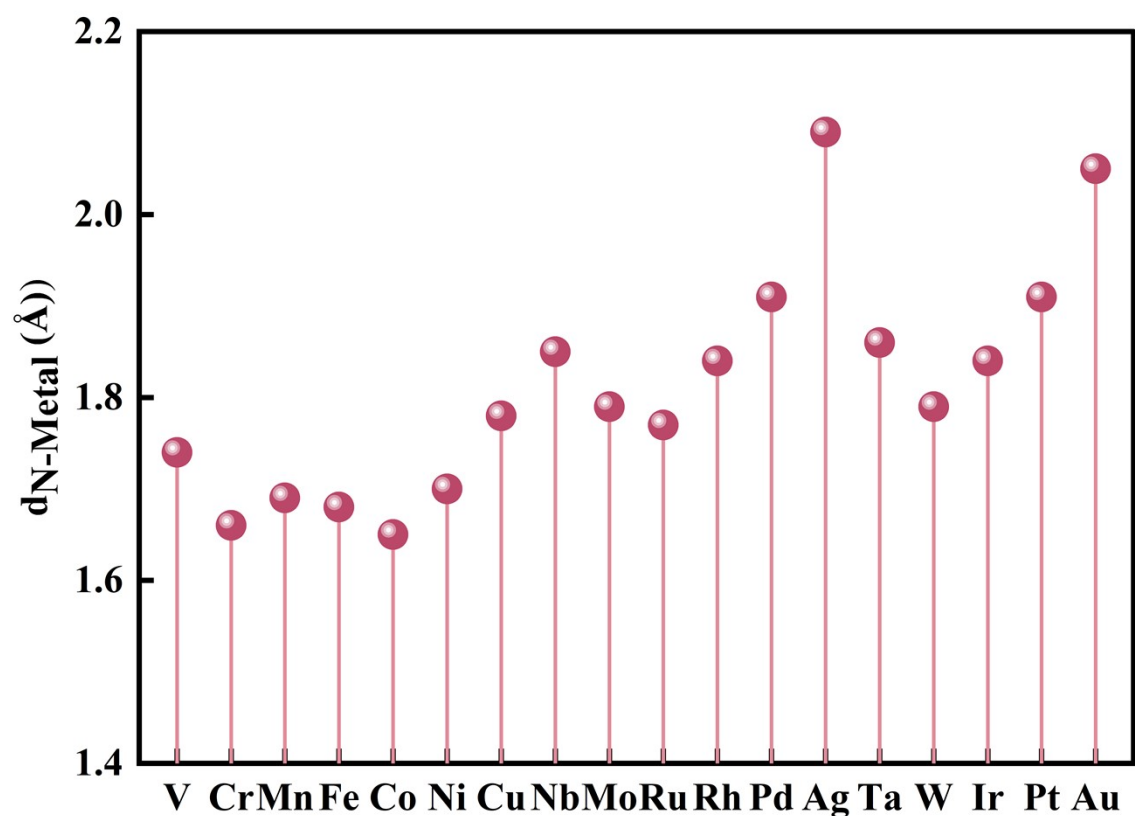

**Fig. S2.** The distance between the anchored single-atom metals and the N ( $d_{N-Metal}$ , Å).

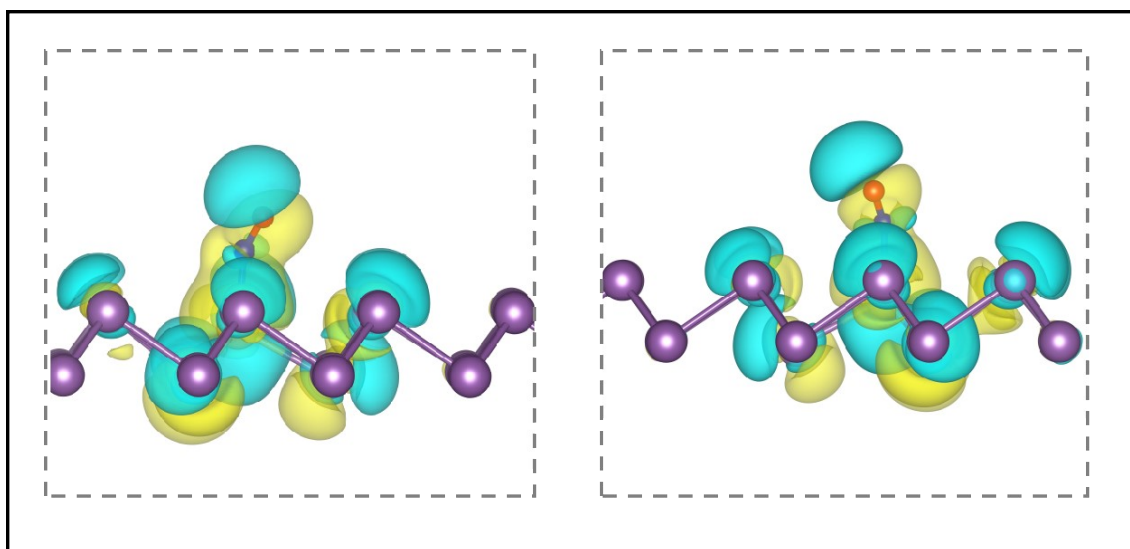

**Fig. S3.** The charge density difference of the NO molecule on the Au/Sb catalyst, where the isosurface value is set to be  $0.005 e \text{ \AA}^{-3}$ , and cyan and yellow bubbles represent positive and negative charges, respectively.

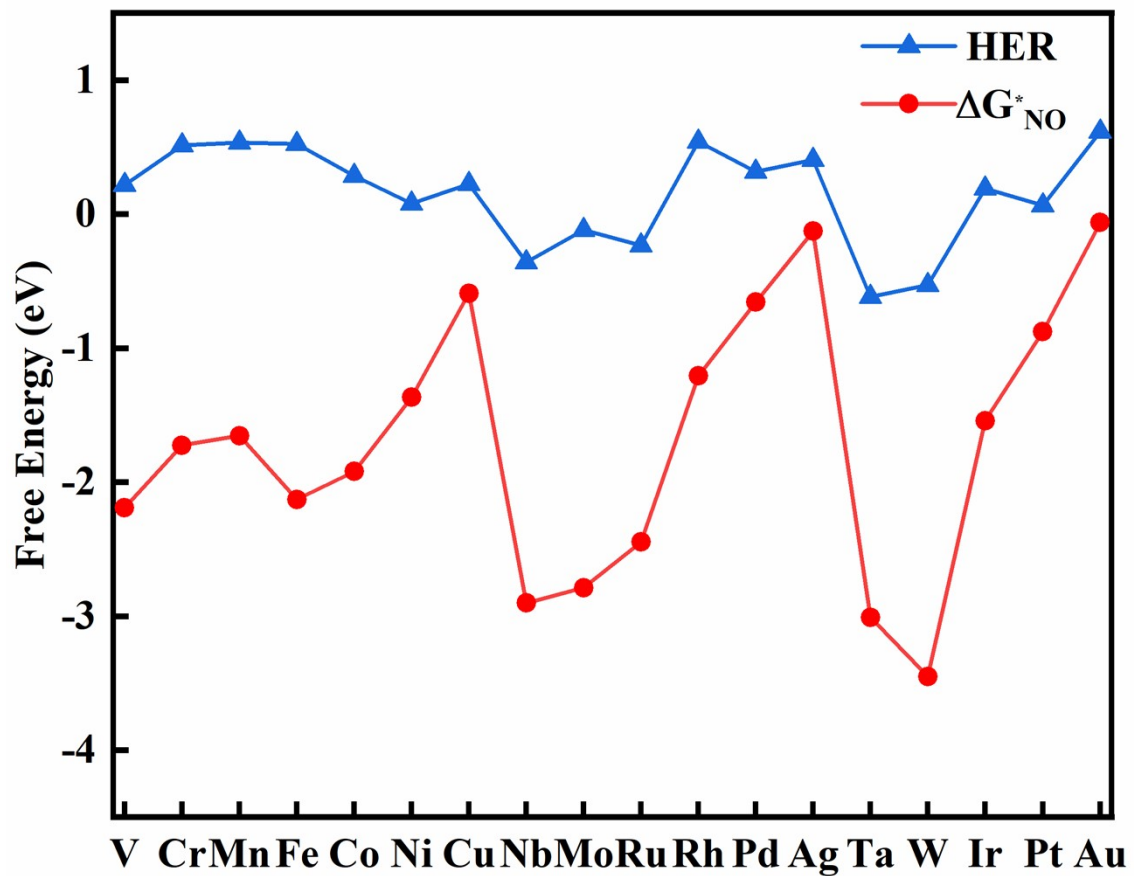

Fig. S4. The calculated Gibbs free energy changes of  $\Delta G^*_{NO}$  and HER.

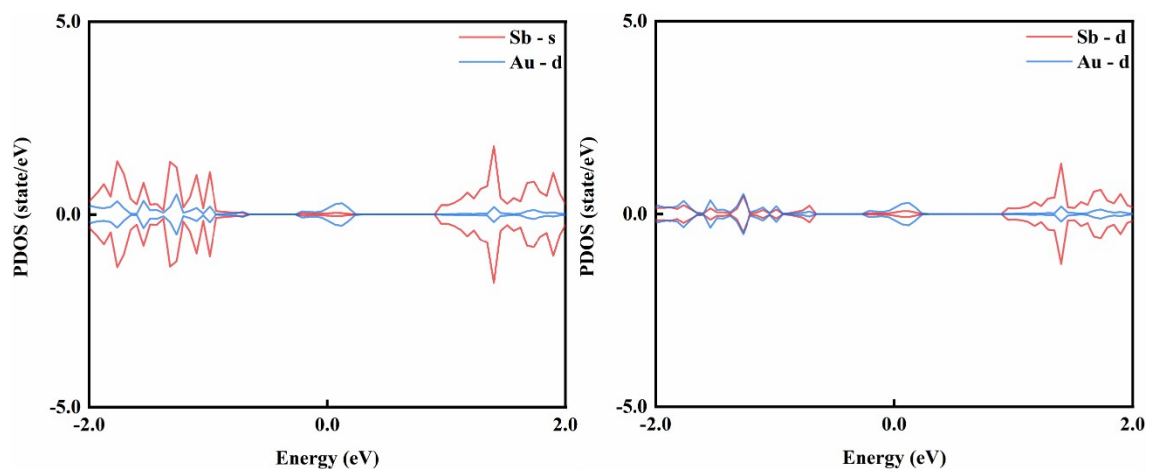

**Fig. S5.** Electronic partial density of states (PDOS) of Sb-s and Sb-d for the Au/Sb system.

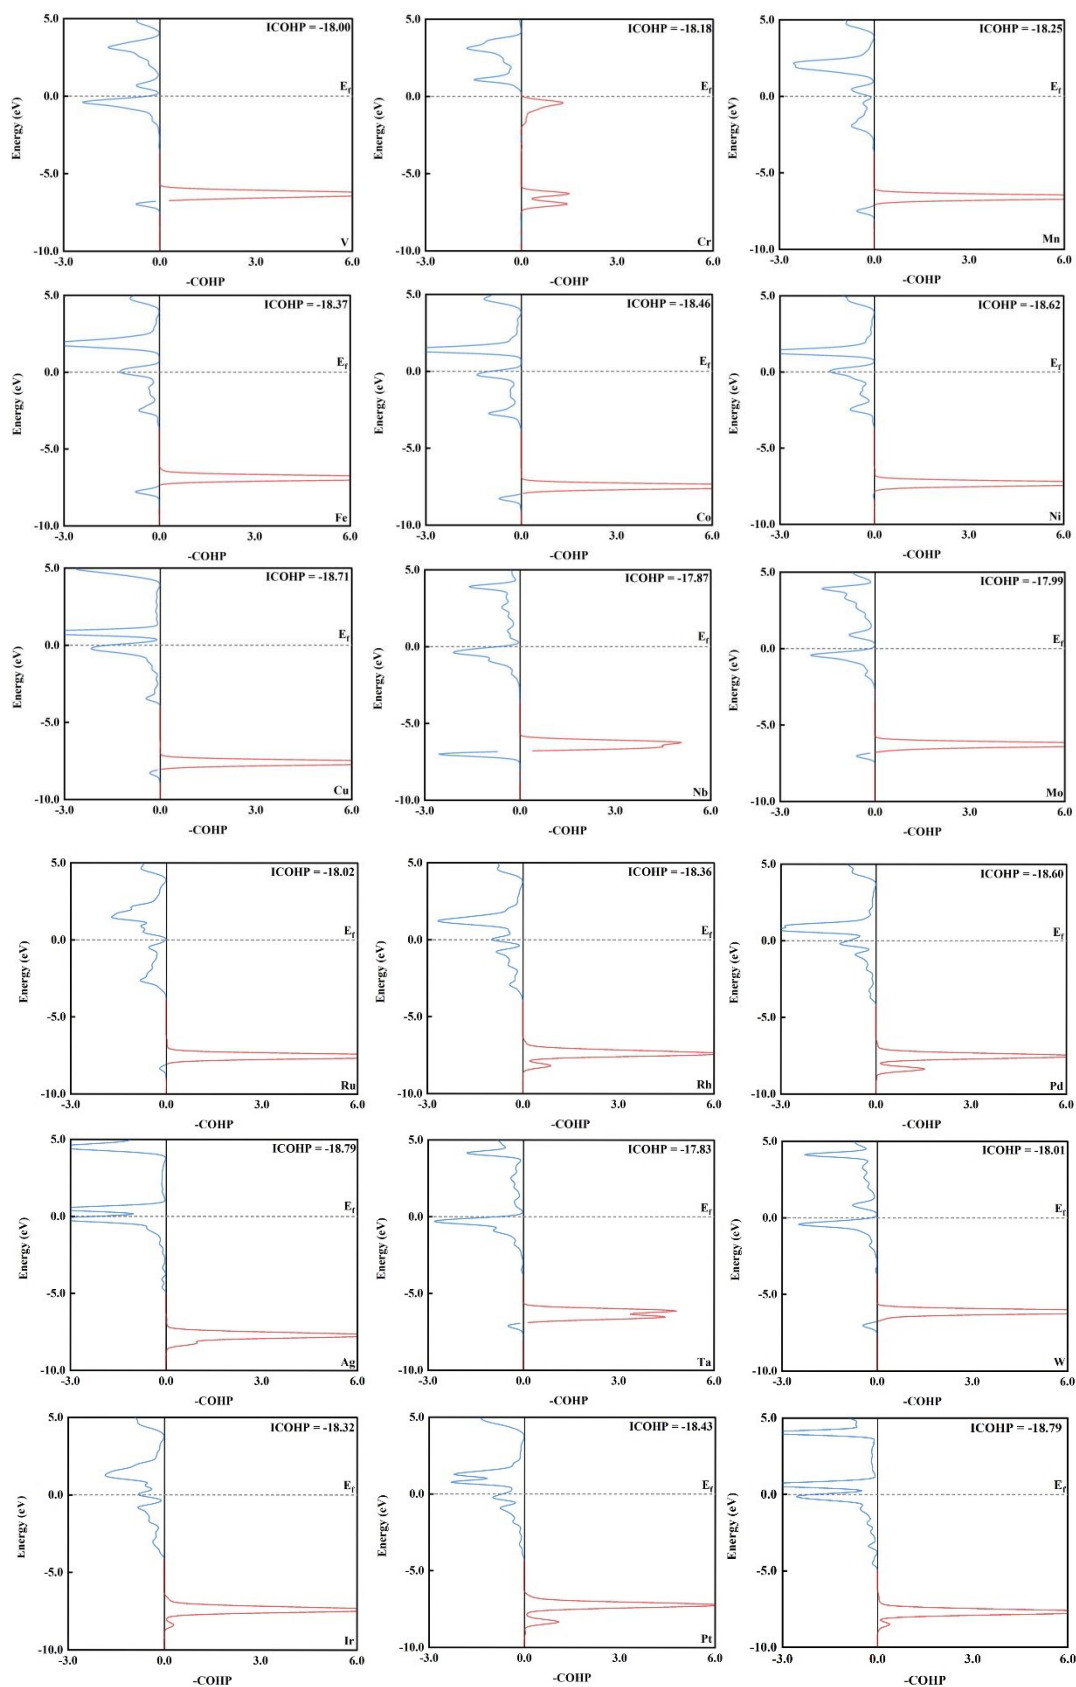

**Fig. S6.** Integrated crystal orbital Hamilton population (ICOHP) of M/Sb.

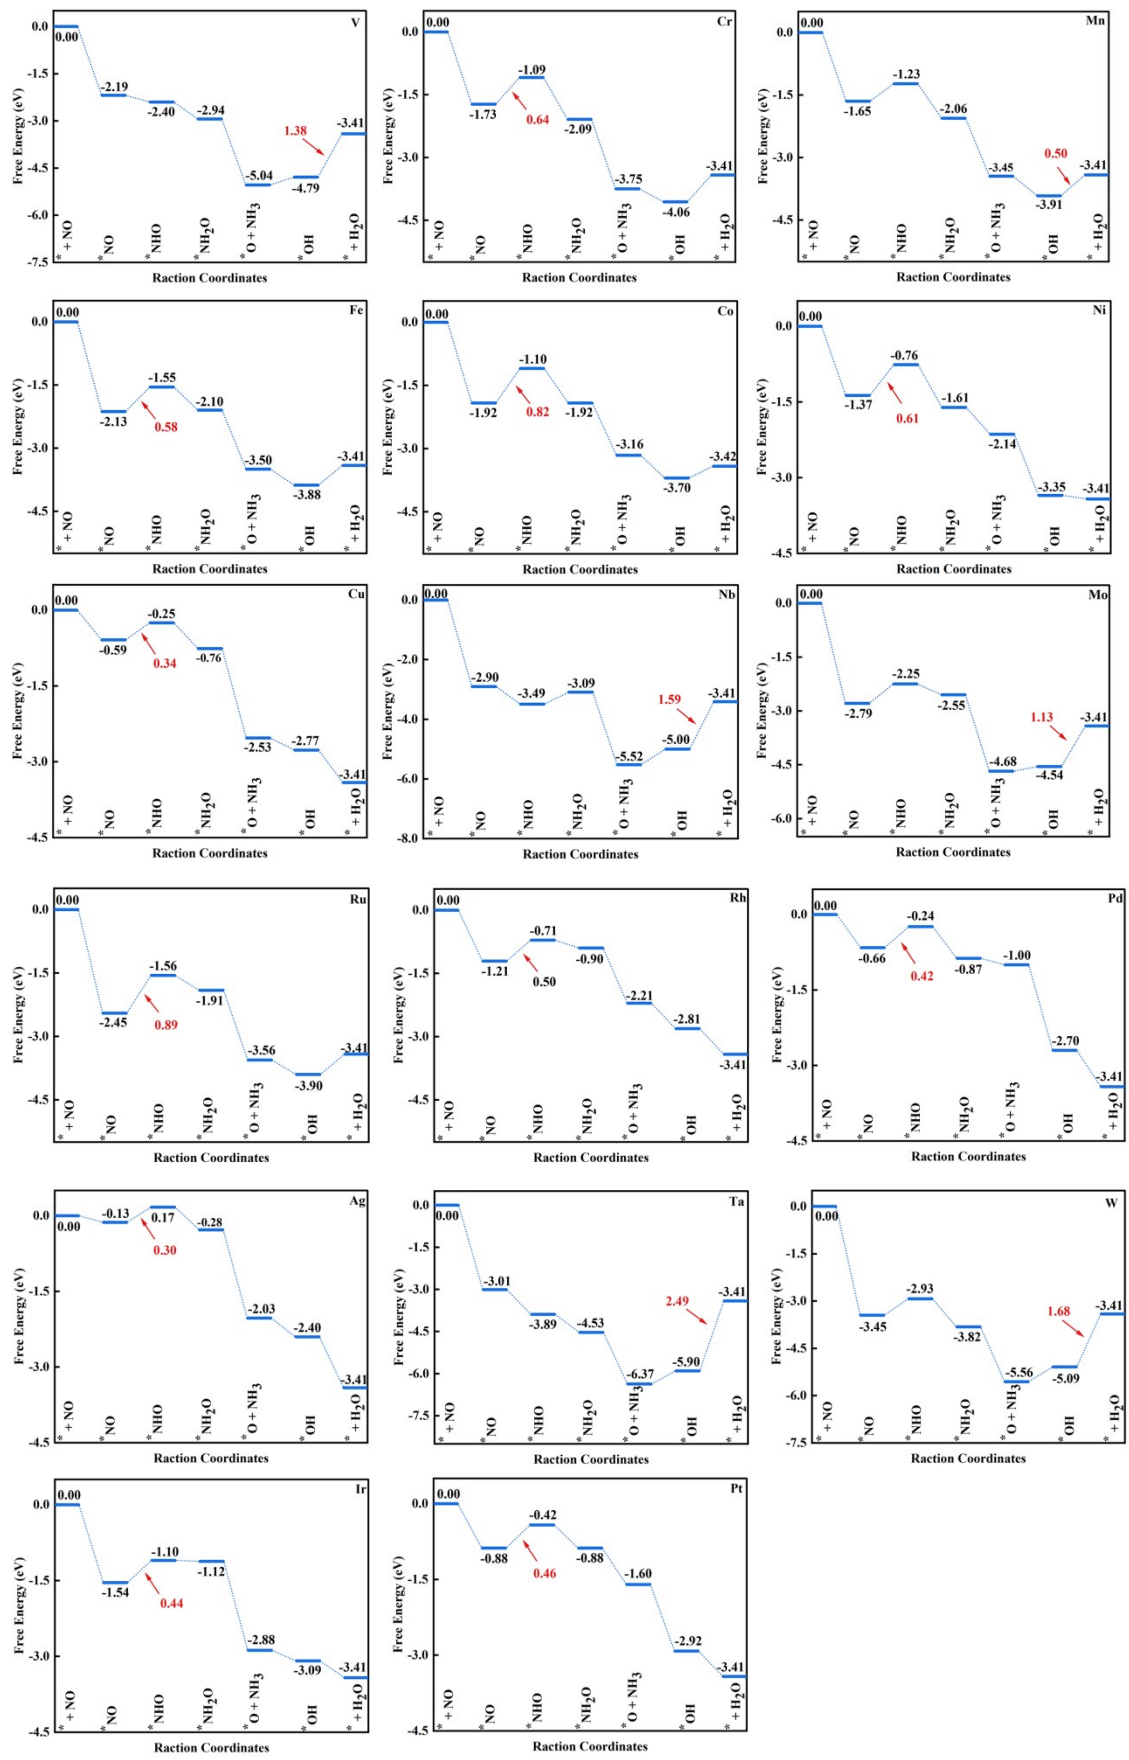

**Fig. S7.** The reaction pathways of NORR to  $\text{NH}_3$  products are considered along possible mechanisms.

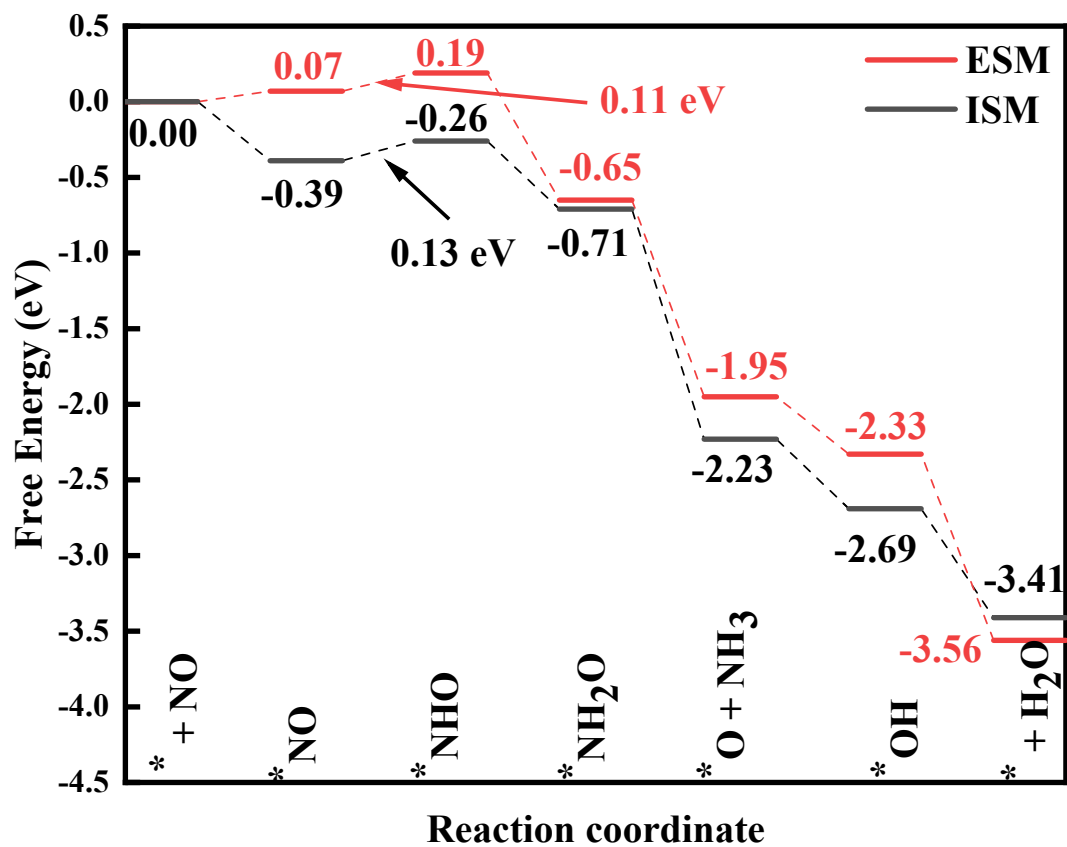

**Fig. S8.** Free energy diagrams for NORR on Au/Sb under implicit solvation (ISM) and explicit solvation (ESM) conditions

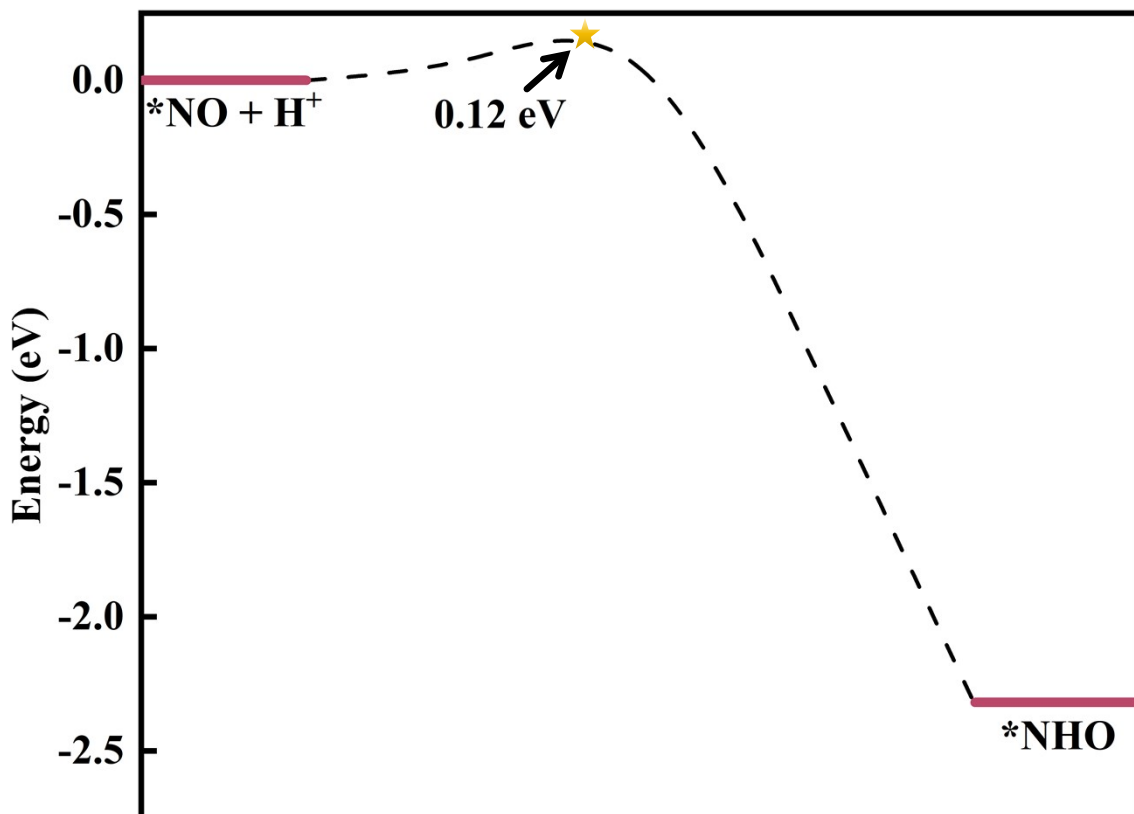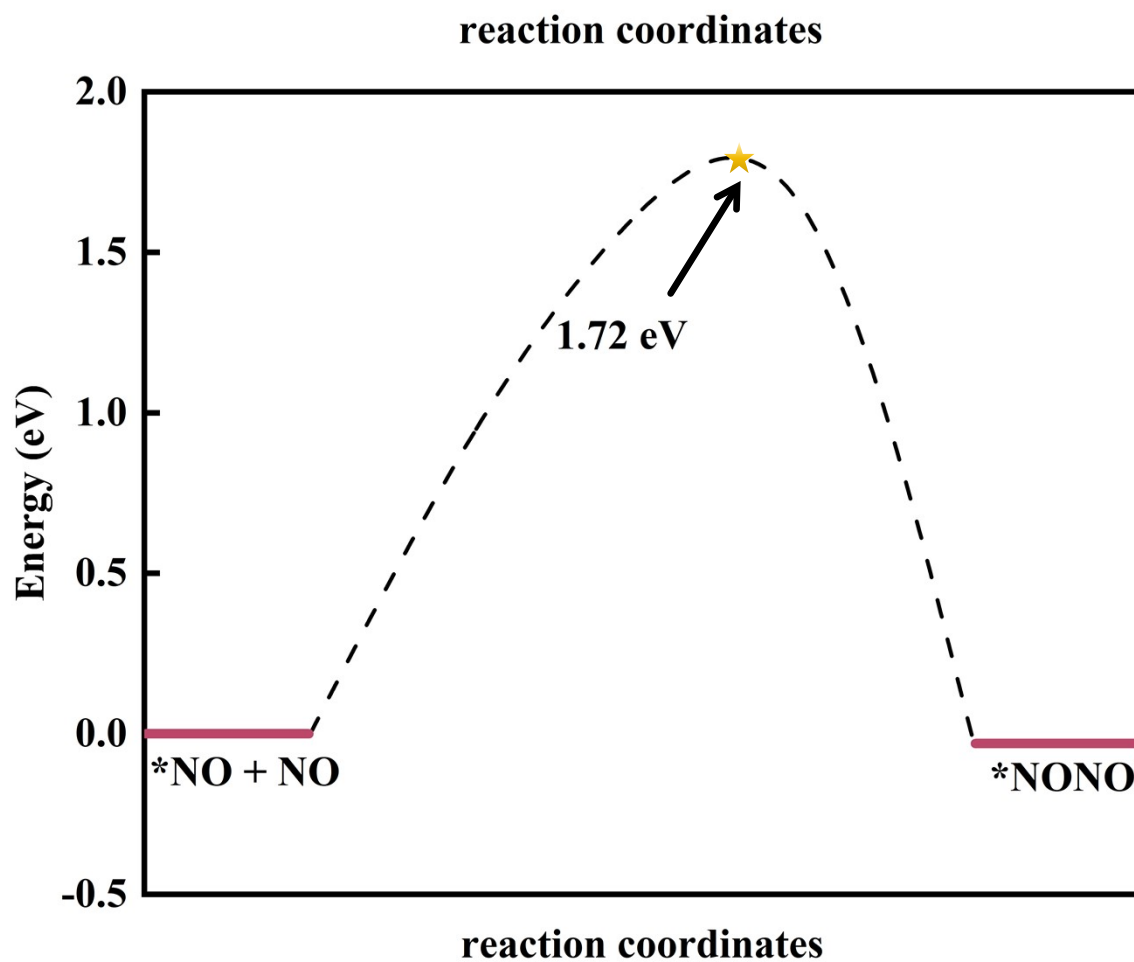

**Fig. S9.** The Kinetic barriers for NO hydrogenation reaction and  $^*N_2O_2$  formation on Au/Sb surfaces.

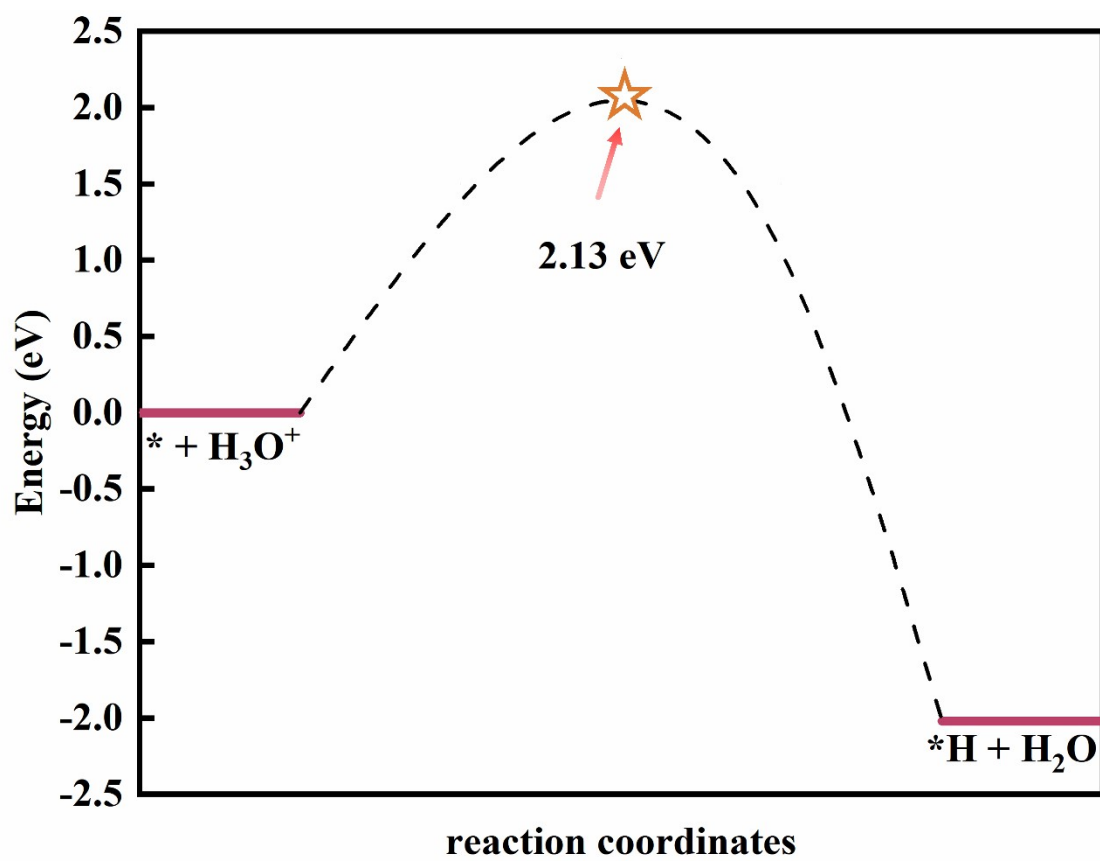

**Fig. S10.** Kinetic energy barrier for \*H adsorption supplied by H<sub>3</sub>O<sup>+</sup> on the Au/Sb surface.
